# Supplementary material for: Antimicrobial and anti-adhesive properties of carbon nanotube-based surfaces for medical applications: a systematic review
Source: PubMed Central journal article supplement — iScience. 2020 Dec 29;24(1):102001. doi: 10.1016/j.isci.2020.102001 (PMC7809508; doi:10.1016/j.isci.2020.102001), 2020-12-29
Supplement: mmc1.pdf [file mmc1.pdf]

**iScience, Volume 24**

**Supplemental Information**

**Antimicrobial and anti-adhesive properties  
of carbon nanotube-based surfaces  
for medical applications: a systematic review**

**Rita Teixeira-Santos, Marisa Gomes, Luciana C. Gomes, and Filipe J. Mergulhão**

## **SUPPLEMENTARY INFORMATION**

### **TRANSPARENT METHODS**

#### **Search strategy, inclusion criteria and data extraction**

This systematic review was conducted following the PRISMA statement (Preferred Reporting Items for Systematic reviews and Meta-Analysis) guidelines (Moher et al., 2009). The search was performed until 18 May 2020 in PubMed, Scopus, and Compendex libraries through the combination of the following keywords: “carbon nanotubes”, “antimicrobial”, “antifouling”, “adhesion”, “biofilm”, “antibiofilm” and “medical applications”. Peer-reviewed full-text articles in English published since January 2000 concerning the antimicrobial and anti-adhesive properties of CNTs with application in the medical field were assessed for eligibility. The adopted inclusion criteria for qualitative synthesis were as follows: (a) studies addressing the development of CNT composite films; (b) studies focused on the antimicrobial and/or anti-adhesive activities of CNT, alone or in association with other compounds. The exclusion criteria consisted in (a) articles that did not evaluate the antimicrobial activity of CNT composites; and (b) non-original articles.

Two reviewers (RTS and MG) independently applied the inclusion and exclusion criteria, and any differences were resolved by consensus.

Information regarding study design, CNT type (single- or multi-walled), CNT composites, surface materials, medical applications, pathogens, used methodologies and obtained outcomes were gathered.
